RESEARCH ARTICLE

# Intracellular Ca<sup>2+</sup> homeostasis and JAK1/STAT3 pathway are involved in the protective effect of propofol on BV2 microglia against hypoxia-induced inflammation and apoptosis

Yan Lu<sup>1,2</sup>✉, Yuechao Gu<sup>1,2</sup>✉, Xiaowei Ding<sup>1,2</sup>✉, Jiaqiang Wang<sup>1,2</sup>, Jiawei Chen<sup>1,2</sup>‡\*, Changhong Miao<sup>1,2</sup>‡\*

**1** Department of Anesthesiology, Fudan University Shanghai Cancer Centre, Fudan University, Shanghai Shi, P.R. China, **2** Department of Oncology, Shanghai Medical College, Fudan University, Shanghai Shi, P.R. China

✉ These authors contributed equally to this work.

‡ These authors also contributed equally to this work.

\* [jiawei\\_chen@hotmail.com](mailto:jiawei_chen@hotmail.com) (JC); [anesthesiology2016@126.com](mailto:anesthesiology2016@126.com) (CM)

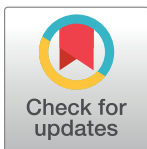

**OPEN ACCESS**

**Citation:** Lu Y, Gu Y, Ding X, Wang J, Chen J, Miao C (2017) Intracellular Ca<sup>2+</sup> homeostasis and JAK1/STAT3 pathway are involved in the protective effect of propofol on BV2 microglia against hypoxia-induced inflammation and apoptosis. PLoS ONE 12(5): e0178098. <https://doi.org/10.1371/journal.pone.0178098>

**Editor:** Kimberly R. Byrnes, Uniformed Services University, UNITED STATES

**Received:** December 9, 2016

**Accepted:** May 7, 2017

**Published:** May 23, 2017

**Copyright:** © 2017 Lu et al. This is an open access article distributed under the terms of the [Creative Commons Attribution License](https://creativecommons.org/licenses/by/4.0/), which permits unrestricted use, distribution, and reproduction in any medium, provided the original author and source are credited.

**Data Availability Statement:** All data files are available from the figshare database (doi:[10.6084/m9.figshare.4667893](https://doi.org/10.6084/m9.figshare.4667893)).

**Funding:** This work was supported by the Nature Science Foundation of Shanghai (No: 14ZR1407500).

**Competing interests:** The authors have declared that no competing interests exist.

## Abstract

### Background

Perioperative hypoxia may induce microglial inflammation and apoptosis, resulting in brain injury. The neuroprotective effect of propofol against hypoxia has been reported, but the underlying mechanisms are far from clear. In this study, we explored whether and how propofol could attenuate microglia BV2 cells from CoCl<sub>2</sub>-induced hypoxic injury.

### Methods

Mouse microglia BV2 cells were pretreated with propofol, and then stimulated with CoCl<sub>2</sub>. TNF-α level in the culture medium was measured by ELISA kit. Cell apoptosis and intracellular calcium concentration were measured by flow cytometry analysis. The effect of propofol on CoCl<sub>2</sub>-modulated expression of Ca<sup>2+</sup>/Calmodulin (CaM)-dependent protein kinase II (CAMKIIα), phosphorylated CAMKIIα (pCAMKIIα), STAT3, pSTAT3<sup>Y705</sup>, pSTAT3<sup>S727</sup>, ERK1/2, pERK1/2, pNFκB(p65), pro-caspase3, cleaved caspase 3, JAK1, pJAK1, JAK2, pJAK2 were detected by Western blot.

### Results

In BV2 cell, CoCl<sub>2</sub> treatment time-dependently increased TNF-α release and induced apoptosis, which were alleviated by propofol. CoCl<sub>2</sub> (500μmol/L, 8h) treatment increased intracellular Ca<sup>2+</sup> level, and caused the phosphorylation of CAMKIIα, ERK1/2 and NFκB (p65), as well as the activation of caspase 3. More importantly, these effects could be modulated by 25μmol/L propofol via maintaining intracellular Ca<sup>2+</sup> homeostasis and via up-regulating the phosphorylation of JAK1 and STAT3 at Tyr705.

## Conclusion

Propofol could protect BV2 microglia from hypoxia-induced inflammation and apoptosis. The potential mechanisms may involve the maintaining of intracellular  $\text{Ca}^{2+}$  homeostasis and the activation of JAK1/STAT3 pathway.

## Introduction

Perioperative acute ischemic/hypoxic stroke is one of the most serious complications during many surgical procedures, and it is associated with high morbidity and mortality. In the central nervous system, microglia, acting as the unique resident immune cells, could be activated following brain ischemia/hypoxia[1, 2]. Its activation can lead to the production and release of multiple pro-inflammatory cytokines, such as interleukin (IL)-1 and tumor necrosis factor-alpha (TNF- $\alpha$ ). TNF- $\alpha$ , the major pro-inflammatory cytokine, may serve as a marker for inflammation. In the central nervous system, TNF- $\alpha$ -induced inflammation may damage neural cells and the blood-brain barrier[3]. In addition, ischemia/hypoxia may also cause microglial apoptosis, leading to impaired immune response[4].

Intracellular calcium, one of the most important second messenger, played a pivotal role in multiple physical procedures and noxious stimulation can induce an increase of Intracellular  $\text{Ca}^{2+}$ . Previous studies reported that hypoxia could induce intracellular  $\text{Ca}^{2+}$  overload[5, 6]. Microglial cells are the resident immune cells in the central nervous system and many of their physiological functions are linked to  $\text{Ca}^{2+}$  signaling[7]. Previous studies showed that morphological changes, migration, proliferation, and secretion of cytokines and reactive oxygen species were related to intracellular  $\text{Ca}^{2+}$  overload [8, 9]. As the major isoform of  $\text{Ca}^{2+}$ /calmodulin-dependent protein kinase (CaMK) in brain, CaMKII $\alpha$  is highly sensitive to intracellular  $\text{Ca}^{2+}$  levels. Recent data suggested that the activation of CaMKII $\alpha$  is directly associated with the production of pro-inflammatory cytokines, such as TNF- $\alpha$  and IL-1 $\beta$  and the mechanism may involve phosphorylating and upregulating the expression of several down-stream proteins[10, 11]. Previous studies have showed that ERK 1/2, nuclear factor kappa B (NF- $\kappa$ B) are involved in  $\text{Ca}^{2+}$ -mediated TNF- $\alpha$  release[12].

Janus kinase-signal transducers and activators of transcription (JAK-STAT) signal pathway has been reported to be involved in the immune response of numerous cytokines[13]. Activation of STAT3 and JAK has been shown to mediate ischemic and several pharmacological postconditioning[14–16]. Phosphorylation of JAKs may regulate STAT3's activity by phosphorylating STAT3 on tyrosine705 and serine727 residues. Reduced phosphorylation of STAT3 at Ser727 is usually correlated with increased phosphorylation at Tyr705[17, 18]. A previous study showed that JAK1 and STAT3 are activated in neurons, astrocytes and microglia after focal cerebral infarction, and may provide neuroprotection in the acute phase of ischemia [14].

Propofol (2,6-diisopropylphenol) is a widely used intravenous anesthetic. In addition to sedative property, propofol has been proved to exert beneficial effects in multiple organs and tissues, such as cardiovascular system[19], respiratory system[20] and urinary system[21]. In brain injury model, a previous study showed that propofol could protect central nervous system from hypoxic injury via improving the oxygen supply and maintaining oxygen metabolism[22]. Another study also showed that propofol protects the brain through maintaining intracellular  $\text{Ca}^{2+}$  homeostasis[23]. However, other groups reported propofol-induced neuroinflammation and cell death in young rodents[24]. An animal study showed that propofol

protected against focal cerebral ischemia via inhibition of microglia-mediated proinflammatory cytokines[25]. However, the mechanism of propofol inhibiting hypoxia-induced microglial activation is yet to be investigated. In this study, we used cobalt chloride ( $\text{CoCl}_2$ ) to build an in vitro hypoxic model and aimed to clarify whether and how propofol attenuates  $\text{CoCl}_2$ -induced BV2 cell injury.

## Materials and methods

### Cell culture and reagents

BV2 microglia cells were obtained from GuangZhou Jennio Bio- tech. The cells were cultured in DMEM (Sigma–Aldrich, Shanghai, China) with 10% fetal bovine serum (Gibco, Life technologies, USA), 100 units/ml penicillin (sigma) and 100  $\mu\text{g}/\text{ml}$  streptomycin (sigma) in an incubator containing 5%  $\text{CO}_2$  at 37°C. BV2 cells were sub-cultured when reaching 90% confluence. The eighth passage was used in the present study.

Propofol (Sigma, St. Louis, MO, USA), calcium chelator BAPTA-AM (Sigma, St. Louis, MO, USA), CAMKII $\alpha$  inhibitor KN93 (Sigma, St. Louis, MO, USA), ERK inhibitor U0126 and JAK1 inhibitor INCB039110 were dissolved in DMSO (Sigma, St. Louis, MO, USA). The final concentration of DMSO was adjusted to 0.01% for each solution to avoid possible non-specific effects. A 500mM stock solution of cobalt chloride ( $\text{CoCl}_2$ ) was prepared by dissolving  $\text{CoCl}_2$  powder (Sigma-Aldrich, Shanghai, China) in serum-free DMEM.

### Experiment design

To determine the appropriate treatment condition, BV2 cells were treated with 500  $\mu\text{M}$   $\text{CoCl}_2$  (sigma) for 0, 1, 2, 4, 8 and 12 h respectively. Cells culture in DMEM, without any treatment, served as the control group. The time with maximal effects on TNF- $\alpha$  production was used as the appropriate treatment condition. Then cells were pre-treated with different concentrations of propofol (sigma) (5  $\mu\text{mol}/\text{L}$ , 25  $\mu\text{mol}/\text{L}$ , 50  $\mu\text{mol}/\text{L}$  and 100  $\mu\text{mol}/\text{L}$ ), followed by  $\text{CoCl}_2$  (500  $\mu\text{M}$ , 8 h) treatment, and the concentration with maximal protective effects was determined. In the following experiments, the optimal concentration of  $\text{CoCl}_2$  and propofol were used to investigate the potential mechanisms.

### Enzyme-linked immunosorbent assay (ELISA)

To determine TNF- $\alpha$  concentration in the culture medium, a TNF- $\alpha$  sandwich ELISA kit from BioSource International Inc was used according to the manufacturer's instructions. The absorbance at 450 nm was measured with a microplate reader. The range of detection was from 0 to 1000 pg/ml.

### Measurement of intracellular free $\text{Ca}^{2+}$ concentration

Intracellular free  $\text{Ca}^{2+}$  concentration was detected by the fluorescent dye Fluo-3 AM (Beyotime biotechnology, shanghai, China). The Fluo-3 could specifically bind to the  $\text{Ca}^{2+}$  and has a strong fluorescence with an excitation wavelength of 488 nm. After designed treatment, BV2 cells were harvested and washed twice with PBS, then resuspended with fluo-3 AM (5  $\mu\text{M}$ ) for 30 min in the dark. Intracellular  $\text{Ca}^{2+}$  was detected by Flow cytometer at 488 nm excitation wavelength.

### Cell apoptosis analysis

Cell apoptosis was detected by propidium iodide (PI) and annexin V staining according to the manufacture's instructions. Briefly, after designed treatment, cells were harvested and stained

with annexin V and PI. Then stained cells were analyzed by flow cytometry (Cytomics FC 500 MPL, Beckman Coulter).

## Western blot analysis

After designed treatment, whole cell extracts were collected and lysed with lysis buffer. Equivalent amounts of protein in each sample (about 40  $\mu\text{g}$ ) were separated by 10% or 12% SDS-PAGE, and transferred to polyvinylidene difluoride (PVDF) membranes. The membranes were blocked with 5% skim milk for 1 h, and then incubated with appropriate primary antibody at 4°C overnight. After that, the membranes were washed and incubated with secondary antibodies conjugated with horseradish peroxidase (HRP) for 1 h at room temperature. The protein bands were developed with the chemiluminescent reagents (Millipore, MA, USA). Antibodies to Stat3 (4904, 1:1000), ERK1/2 (9102, 1:1000), pERK1/2 (4370, 1:500), pNF $\kappa$ B (p65) (3033, 1:500), cleaved caspase 3 (9665, 1:1000), pro-caspase 3 (9665, 1:1000), JAK1 (3332, 1:1000), pJAK1 (74129, 1:500), JAK2 (3771, 1:1000) were obtained from cell signaling technology. Antibodies to pStat3<sup>Y705</sup> (CY6566, 1:500), pStat3<sup>S727</sup> (CY6500, 1:500), pJAK2 (CY6570, 1:500) were obtained from Abways technology. Antibodies to CAMKII $\alpha$  (ab131468, 1:1000), pCAMKII $\alpha$  (ab5683, 1:500) were obtained from Abcam. The antibody to  $\beta$ -actin (6008-1-ig, 1:1000) was obtained from proteintech.  $\beta$ -actin served as loading control and the intensity of each protein band was normalized with that of  $\beta$ -actin.

## Statistical analysis

Results were expressed as mean  $\pm$  SD, and data were obtained from at least 5 separately performed experiments. Differences between groups was determined by one-way ANOVA followed by the Newman-Keuls test using the InStat statistical program (GraphPad Software, San Diego, CA, USA). All results were considered statistically significant at a value of  $p < 0.05$ .

## Results

### Effects of propofol on CoCl<sub>2</sub> induced TNF- $\alpha$ generation

In BV2 cells, 500 $\mu\text{M}$  CoCl<sub>2</sub> treatment induced TNF- $\alpha$  production in a time-dependent manner. Compared with control, we found that treatment of cells with 500 $\mu\text{M}$  CoCl<sub>2</sub> for 8 hours induced a notably generation of TNF- $\alpha$  (Fig 1A,  $p < 0.05$ ). To observe the effect of propofol on CoCl<sub>2</sub> induced TNF- $\alpha$  generation, BV2 cells were pretreated with propofol for 2 h with different concentration (5, 25, 50, 100 $\mu\text{M}$ ) after CoCl<sub>2</sub> treatment. As shown in Fig 1B, 25 $\mu\text{M}$  propofol significantly reduced the CoCl<sub>2</sub>-induced generation of TNF- $\alpha$ . We found that propofol alone had no effect on TNF- $\alpha$  generation (Fig 1C). Thereafter, 8 h treatment of 500 $\mu\text{M}$  CoCl<sub>2</sub> and 25 $\mu\text{M}$  of propofol pretreatment for 2h were used in the following experiments to study the signaling pathway involved in the protective effects of propofol.

### Effects of propofol on CoCl<sub>2</sub> induced cell apoptosis

Compared with control, CoCl<sub>2</sub> (500 $\mu\text{M}$ , 8 h) treatment increased the percentage of apoptotic cells from  $3.33 \pm 0.33\%$  to  $17.87 \pm 1.37\%$  and increased the expression of cleaved caspase 3 by  $2.17 \pm 0.13$  folds (Fig 2,  $p < 0.05$ ). More importantly, we found 25 $\mu\text{M}$  propofol reduced the percentage of apoptotic cells from  $17.87 \pm 1.37\%$  to  $4.56 \pm 0.47\%$  and decreased the expression of cleaved caspase 3 by  $60.9 \pm 0.09\%$  (Fig 2,  $p < 0.05$ ). However, CoCl<sub>2</sub> and propofol treatment had no effect on the expression of pro-caspase 3 (Fig 2). Our data suggested that CoCl<sub>2</sub> induced apoptosis, which could be inhibited by propofol. Besides, 25 $\mu\text{M}$  propofol treatment alone had no effect on cell apoptosis.

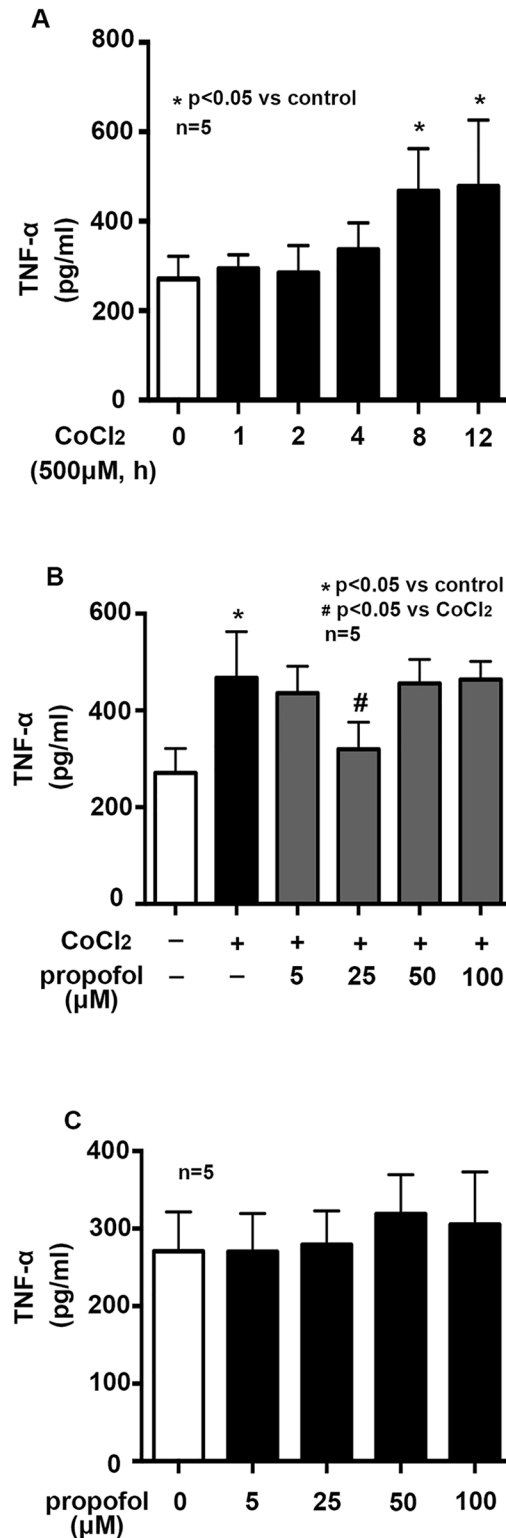

**Fig 1. Propofol attenuates CoCl<sub>2</sub>-induced TNF-α generation.** A, In BV2 cells, 500 μM CoCl<sub>2</sub> treatment induced TNF-α generation in a time-dependent manner, and 8h treatment significantly increased TNF-α generation. B, propofol attenuated CoCl<sub>2</sub>-induced TNF-α generation in a suitable concentration. 25 μM propofol significantly reduced TNF-α generation. C, propofol alone had no effect on TNF-α generation. (\* p < 0.05 vs. control, # p < 0.05 vs. CoCl<sub>2</sub> treatment, n = 5, Data were shown as mean ± SD).

<https://doi.org/10.1371/journal.pone.0178098.g001>

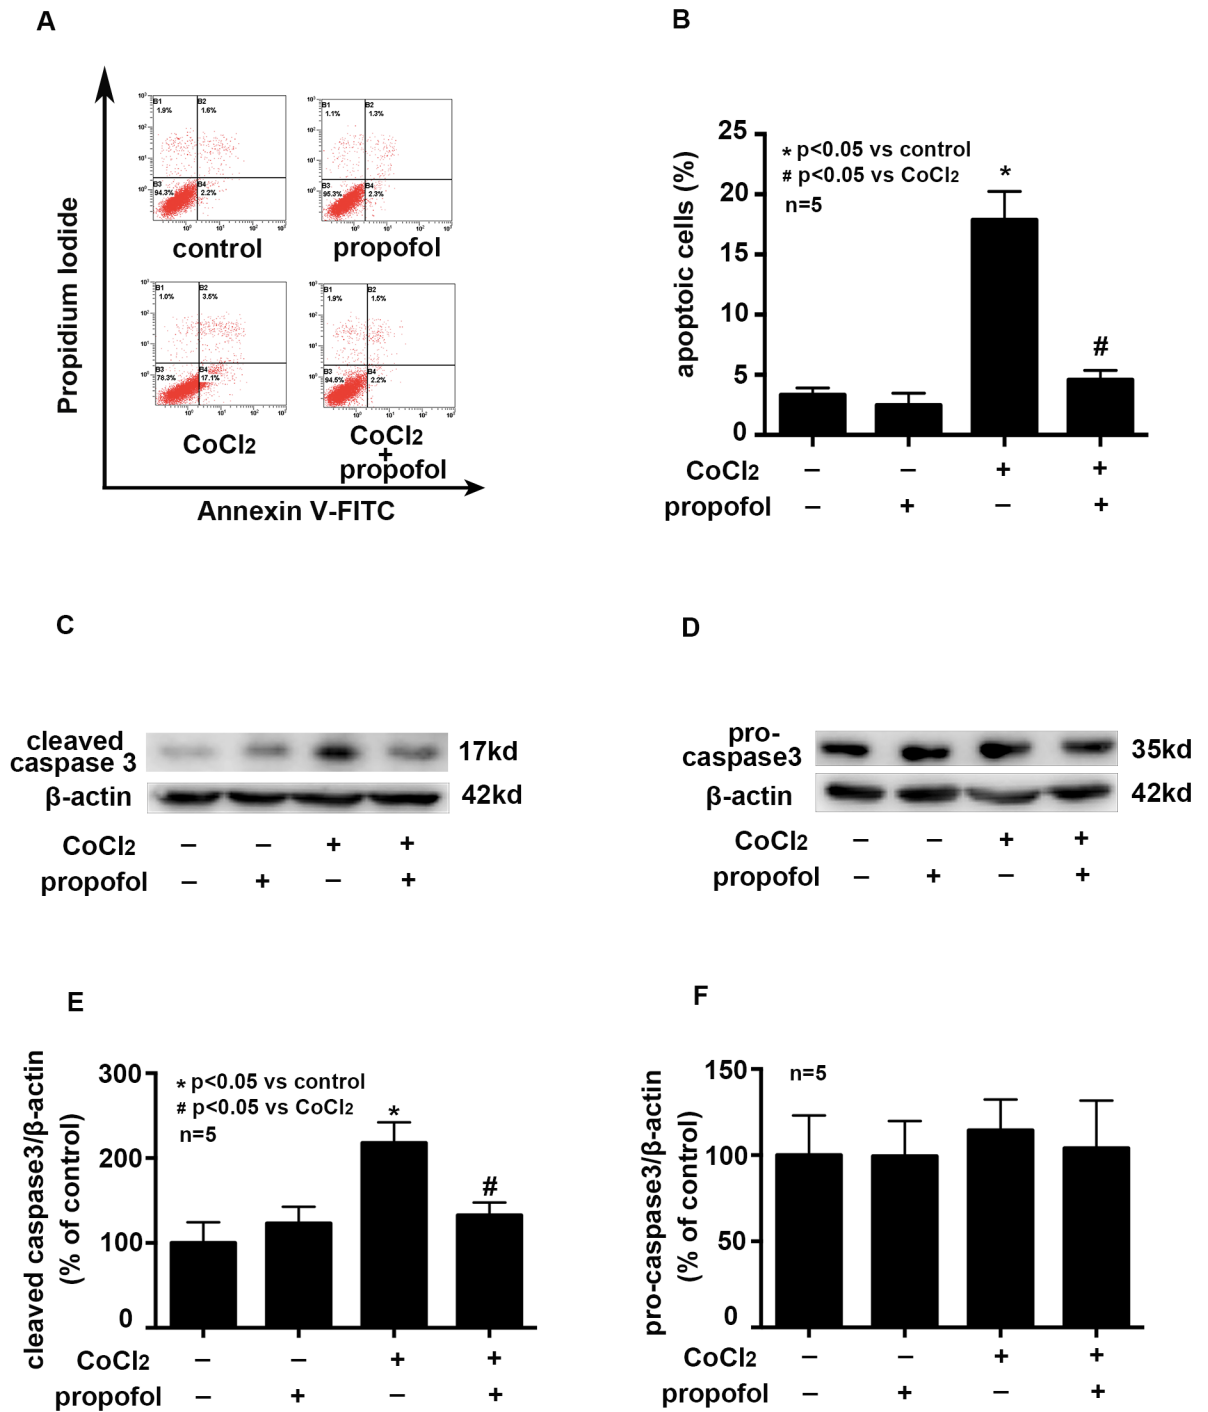

**Fig 2. Propofol attenuated CoCl<sub>2</sub>-induced cell apoptosis.** A and B, CoCl<sub>2</sub>-increased cell apoptosis was attenuated by propofol. C and E, CoCl<sub>2</sub>-induced cleaved caspase 3 overexpression was attenuated by propofol. D and F, CoCl<sub>2</sub> and propofol treatment had no effect on the expression of pro-caspase 3. (\* p < 0.05 vs. control, # p < 0.05 vs. CoCl<sub>2</sub> treatment, n = 5, Data were shown as mean ± SD).

<https://doi.org/10.1371/journal.pone.0178098.g002>

## Effects of propofol on $\text{CoCl}_2$ increased intracellular $\text{Ca}^{2+}$ level and the phosphorylation of CAMKII $\alpha$ , ERK, NF- $\kappa$ B

We found that compared with control,  $\text{CoCl}_2$  treatment increased cytoplasmic  $\text{Ca}^{2+}$  concentration by  $1.33 \pm 0.06$  folds (Fig 3A and 3B,  $P < 0.05$ ), and propofol pretreatment attenuated  $\text{CoCl}_2$ -induced intracellular  $\text{Ca}^{2+}$  overload (Fig 3A and 3B,  $p < 0.05$ ).

We demonstrated that, after  $\text{CoCl}_2$  treatment, the phosphorylation of CAMKII $\alpha$ , ERK, NF- $\kappa$ B proteins enhanced compared with control (Fig 3C, 3D, 3E, 3F, 3G and 3H,  $p < 0.05$ ). More importantly, we found propofol pretreatment down-regulated the phosphorylation of CAMKII $\alpha$  (Fig 3C and 3D,  $p < 0.05$ ), ERK (Fig 3E and 3F,  $p < 0.05$ ) and NF- $\kappa$ B (Fig 3G and 3I,  $p < 0.05$ ). Besides, 25 $\mu$ M propofol treatment alone had no such effects.

## Effects of propofol on $\text{CoCl}_2$ modulated JAK/STAT3 pathway

Previous studies have shown that after focal cerebral infarction, the activation of JAK1 and STAT3 in microglia may provide neuroprotection in the acute phase of ischemia [14]. Here, we found that  $\text{CoCl}_2$  treatment decreased the expression and phosphorylation of JAK1 (Fig 4A, 4B and 4C,  $p < 0.05$ ), but increased the expression and phosphorylation of JAK2 (Fig 4D, 4E and 4F,  $p < 0.05$ ). Besides,  $\text{CoCl}_2$  treatment decreased the phosphorylation of STAT3 at Tyr-705, but had no effect on the phosphorylation of STAT3 at Ser-727 (Fig 4G, 4H and 4I,  $p < 0.05$ ). More importantly, we found propofol attenuated these  $\text{CoCl}_2$ -modulated effects (Fig 4,  $p < 0.05$ ).

## Effects of propofol, BAPTA-AM, KN93, U0126, INCB039110 on $\text{CoCl}_2$ induced TNF- $\alpha$ generation

To confirm the role of  $\text{Ca}^{2+}$  homeostasis and the phosphorylation of CAMKII $\alpha$ , ERK and NF- $\kappa$ B on the production of TNF- $\alpha$ , BV2 cells were pretreated with calcium chelator BAPTA-AM, CAMKII $\alpha$  inhibitor KN93, or ERK inhibitor U0126 followed by  $\text{CoCl}_2$  treatment. We found that compared with  $\text{CoCl}_2$  treatment, BAPTA-AM, KN93 and U0126 significantly decreased the generation of TNF- $\alpha$ , which was similar to propofol treatment. Further, to confirm the role of JAK1/STAT3 pathway in the anti-inflammatory property of propofol, BV2 cells were pretreated with propofol and selective JAK1 inhibitor INCB039110 followed by  $\text{CoCl}_2$  treatment. We found INCB039110 alleviated the effect of propofol, resulting in increased production of TNF- $\alpha$  (Fig 5,  $p < 0.05$ ).

## Effects of propofol, BAPTA-AM, KN93, U0126 on $\text{CoCl}_2$ induced the phosphorylation of CAMKII $\alpha$ , ERK, NF- $\kappa$ B

To confirm the role of the phosphorylation of CAMKII $\alpha$ , ERK and NF- $\kappa$ B in the protective effects of propofol against  $\text{CoCl}_2$  treatment, BV2 cells were pretreated with calcium chelator BAPTA-AM, CAMKII $\alpha$  inhibitor KN93, or ERK inhibitor U0126 followed by  $\text{CoCl}_2$  treatment. We found that compared with  $\text{CoCl}_2$  treatment, BAPTA-AM and KN93 significantly decreased the phosphorylation of CAMKII $\alpha$ , which was similar with propofol treatment. However, U0126 pretreatment had no effect on the phosphorylation of CAMKII $\alpha$  (Fig 6A and 6B,  $p < 0.05$ ). Compared to  $\text{CoCl}_2$  treatment, BAPTA-AM, KN93 and U0126 significantly decreased the phosphorylation of ERK (Fig 6C and 6D,  $p < 0.05$ ) and NF- $\kappa$ B (Fig 6E and 6F,  $p < 0.05$ ), which was similar to propofol treatment.

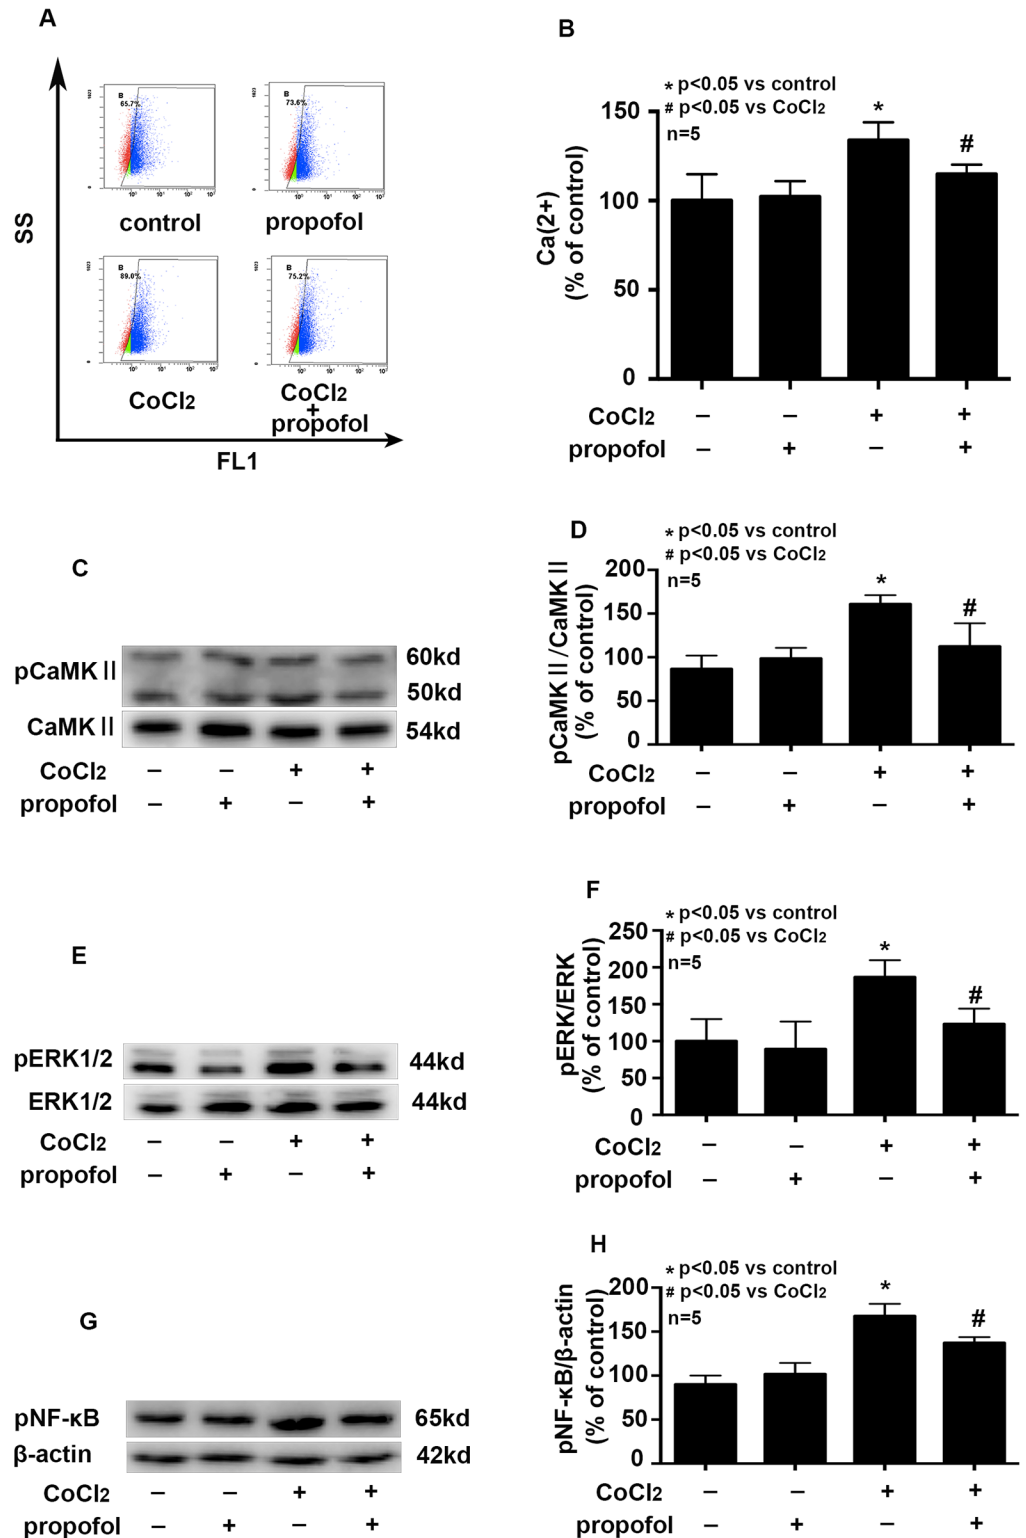

**Fig 3. Effects of propofol on CoCl<sub>2</sub> induced the destruction of intracellular Ca<sup>2+</sup> homeostasis and the phosphorylation of CAMKIIα, ERK, NF-κB.** A and B, CoCl<sub>2</sub>-increased intracellular Ca<sup>2+</sup> concentration was attenuated by propofol. C, D, E, F, G and H, CoCl<sub>2</sub>-induced the phosphorylation of CAMKIIα, ERK and NF-κB were attenuated by propofol. (\* p < 0.05 vs. control, # p < 0.05 vs. CoCl<sub>2</sub> treatment, n = 5, Data were shown as mean ± SD).

<https://doi.org/10.1371/journal.pone.0178098.g003>



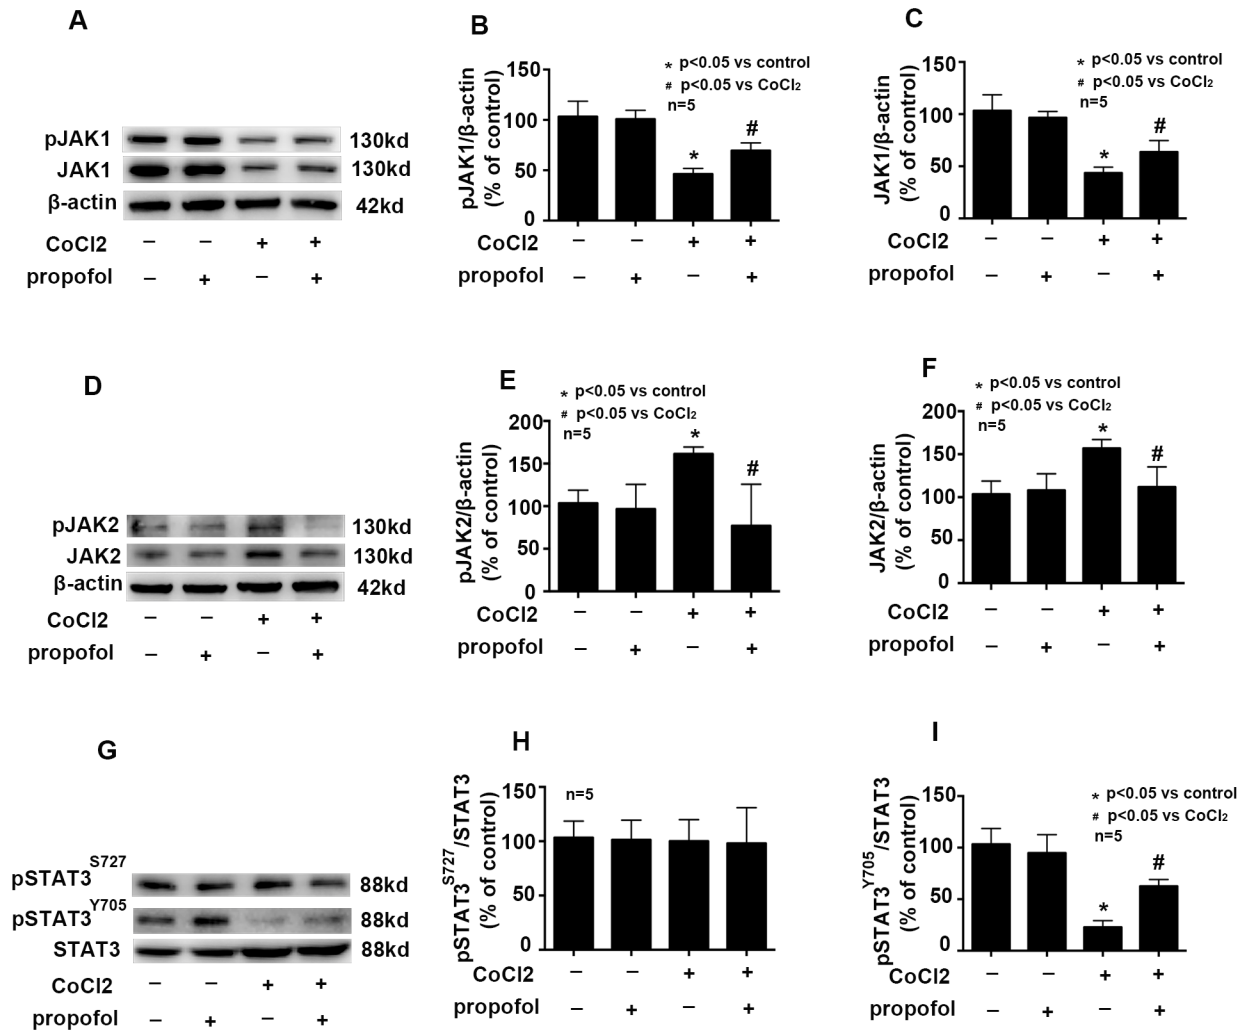

**Fig 4. Effects of propofol on CoCl<sub>2</sub> modulated JAK/STAT3 pathway.** A, B and C, CoCl<sub>2</sub>-decreased the expression and phosphorylation of JAK1 were attenuated by propofol. D, E, and F, CoCl<sub>2</sub>-increased the expression and phosphorylation of JAK2 were attenuated by propofol. G, H and I, CoCl<sub>2</sub>-decreased the phosphorylation of STAT3 at Tyr705 were attenuated by propofol. CoCl<sub>2</sub> and propofol had no effect on the phosphorylation of STAT3 at Ser727. (\* p < 0.05 vs. control, # p < 0.05 vs. CoCl<sub>2</sub> treatment, n = 5, Data were shown as mean ± SD).

<https://doi.org/10.1371/journal.pone.0178098.g004>

### Effects of propofol, BAPTA-AM, KN93 and U0126 on CoCl<sub>2</sub> induced cell apoptosis

To confirm the role of Ca<sup>2+</sup> homeostasis and the phosphorylation of CAMKIIα, ERK and NF-κB pathway on cell apoptosis, BV2 cells were pretreated with calcium chelator BAPTA-AM, CAMKIIα inhibitor KN93, or ERK inhibitor U0126 followed by CoCl<sub>2</sub> treatment. Compared with CoCl<sub>2</sub> treatment, BAPTA could reduce the percentage of apoptotic cells from 17.87 ± 1.37% to 6.2 ± 1.17%, KN93 could reduce the percentage of apoptotic cells from 17.87 ± 1.37% to 7.53 ± 1.57% and U0126 could reduce the percentage of apoptotic cells from 17.87 ± 1.37% to 7.8 ± 1.33% (Fig 7A and 7B, p<0.05). We also found that, compared with CoCl<sub>2</sub> treatment, BAPTA decreased the expression of cleaved caspase 3 by 85.9 ± 0.02%, KN93 decreased the expression of cleaved caspase 3 by 103 ± 0.17%, and U0126 decrease the expression of cleaved caspase 3 by 136 ± 0.34% (Fig 7C and 7E, P<0.05). However, Propofol,

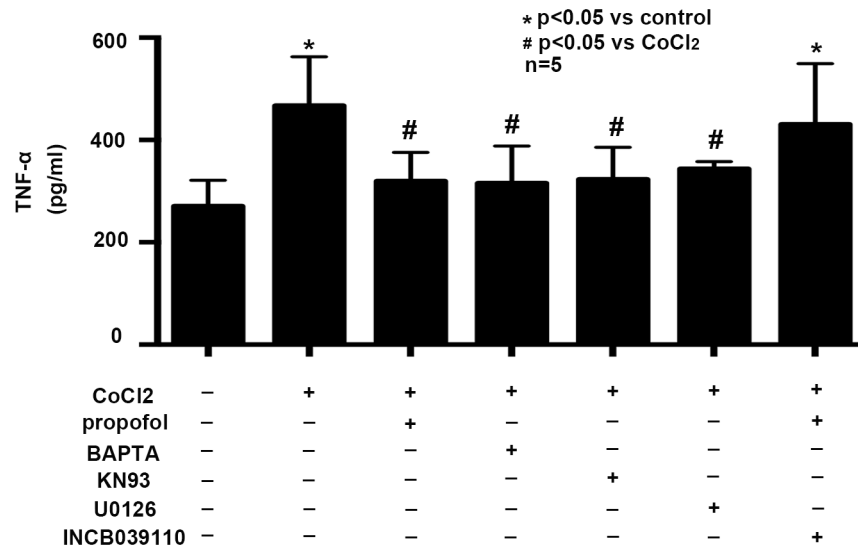

**Fig 5. Effects of propofol, BAPTA-AM, KN93, U0126, INCB039110 on CoCl<sub>2</sub> induced TNF-α generation.** CoCl<sub>2</sub> treatment induced TNF-α generation was attenuated by propofol and BAPTA-AM, KN93, U0126. The effect of propofol on TNF-α generation was reversed by INCB039110. (\* p < 0.05 vs. control, # p < 0.05 vs. CoCl<sub>2</sub> treatment, n = 5, Data were shown as mean ± SD).

<https://doi.org/10.1371/journal.pone.0178098.g005>

BAPTA-AM, KN93 and U0126 pretreatment had no effect on the expression of pro-caspase 3 (Fig 7D and 7F, p < 0.05).

## Discussion

In the present study, we found that CoCl<sub>2</sub> treatment could disrupt the intracellular Ca<sup>2+</sup> homeostasis, and phosphorylate CAMKIIα, ERK and NF-κB, resulting in the production of TNF-α and apoptosis. More importantly, we found propofol could protect BV2 cells from CoCl<sub>2</sub>-induced injury via maintaining the intracellular Ca<sup>2+</sup> homeostasis and via inhibiting Ca<sup>2+</sup>-related signaling pathway, as well as via up-regulating JAK1/STAT3 pathway.

Emerging evidences have suggested that transient cerebral ischemia/hypoxia may lead to microglial malfunction and microglial activation may lead to neurodegeneration via inflammation or cell injury[26–28]. Here, we used CoCl<sub>2</sub>-treated BV2 cell line to mimic the cerebral hypoxia in vivo. We found CoCl<sub>2</sub> treatment induced the release of TNF-α (Fig 1). TNF-α is a main pro-inflammatory cytokine, and is mainly produced by activated microglia during the neuroinflammation. Growing evidence showed that the overproduction of TNF-α by microglia contributes to pathophysiological changes observed in various neurologic diseases and brain injury [3, 29]. In addition to inflammation caused by ischemia/hypoxia, we also found CoCl<sub>2</sub> treatment induced cell apoptosis (Fig 2).

As mentioned above, intracellular calcium plays a key role in maintain cell function and noxious stimulations can induce an increase of intracellular Ca<sup>2+</sup> concentration. Besides, intracellular Ca<sup>2+</sup> overload could upregulate the expression of several down-stream proteins. In the situation of ischemic myocardial stress response, CAMKIIα could activate ERK and NF-κB, thus regulating inflammation and injury[12]. In our study, as shown in Fig 3, CoCl<sub>2</sub> treatment disrupted the intracellular Ca<sup>2+</sup> homeostasis and inducing the phosphorylation of CAMKIIα, ERK and NF-κB.

JAK/STAT signaling plays an essential role in promoting and modulating immune and inflammatory processes[30]. Activation of the JAK/STAT pathway has been associated with

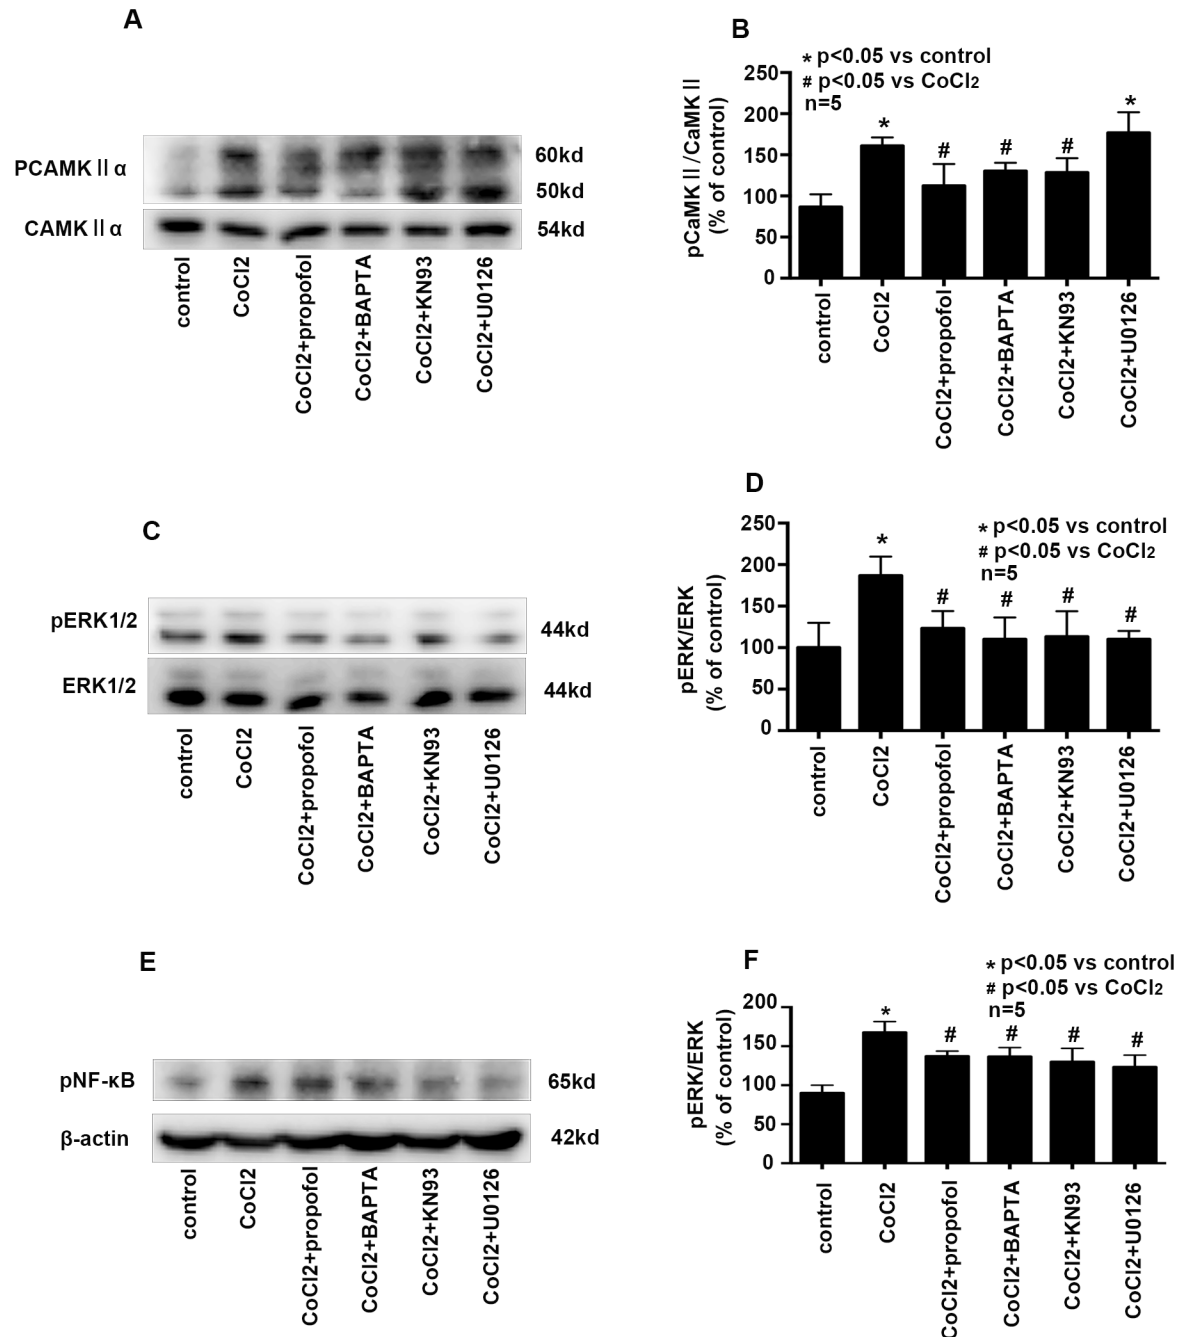

**Fig 6. Effects of propofol, BAPTA-AM, KN93, U0126 on CoCl<sub>2</sub> induced the phosphorylation of CAMKIIα, ERK, NF-κB.** CoCl<sub>2</sub>-induced the phosphorylation of CAMKIIα, ERK and NF-κB were attenuated by propofol, BAPTA-AM, KN93 and U0126. (\* p < 0.05 vs. control, # p < 0.05 vs. CoCl<sub>2</sub> treatment, n = 5, Data were shown as mean ± SD).

<https://doi.org/10.1371/journal.pone.0178098.g006>

pathological conditions such as cerebral ischemia, traumatic brain injury and brain inflammation[31–33]. In the central nervous system, STAT1, STAT3 and STAT6 play an important role during brain development. It has been demonstrated that STAT3 plays critical roles in promoting the survival of neurons under pathological conditions[34]. It is known that STAT3 is activated by JAK1 and JAK2 in neuron cell lines[35]. As shown in Fig 4, we found CoCl<sub>2</sub>

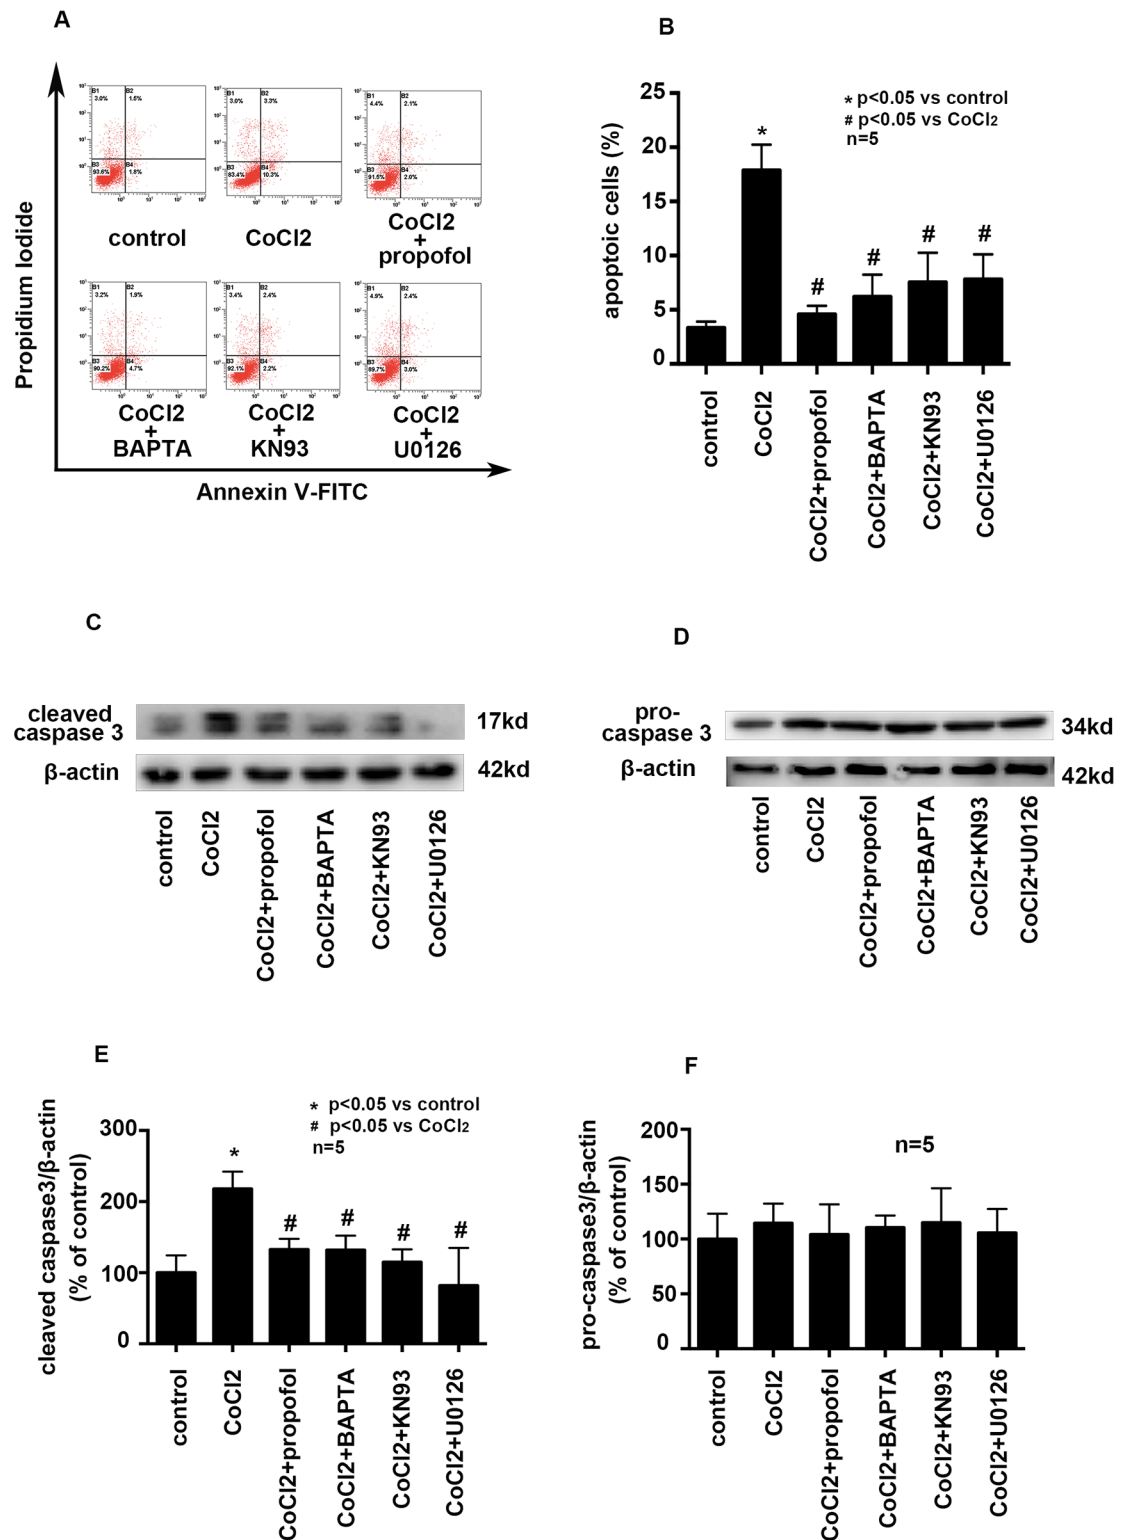

**Fig 7. Effects of propofol, BAPTA-AM, KN93, U0126 on CoCl<sub>2</sub> induced cell apoptosis.** A and B, CoCl<sub>2</sub>-increased cell apoptosis was attenuated by propofol, BAPTA-AM, KN93 and U0126. C and E, CoCl<sub>2</sub>-induced cleaved caspase 3 overexpression was attenuated by propofol, BAPTA-AM, KN93 and U0126. D and F, CoCl<sub>2</sub>, propofol, BAPTA-AM, KN93 and U0126 had no effect on the expression of pro-caspase 3. (\* p < 0.05 vs. control, # p < 0.05 vs. CoCl<sub>2</sub> treatment, n = 5, Data were shown as mean ± SD).

<https://doi.org/10.1371/journal.pone.0178098.g007>

affected the phosphorylation of both JAK1 and JAK2. In addition, STAT3 function is controlled by phosphorylation at two sites: phosphorylation of Tyr705 by JAK leads to STAT3 transcriptional activation whereas the role of the second phosphorylation site (Ser727) varies depending on cell type and pathological conditions[36]. Besides, Ser727 phosphorylation was considered a negative regulatory mechanism of STAT3 activity[37]. A previous study showed that JAK1 and STAT3 are activated in neurons, astrocytes and microglia after focal cerebral infarction, and may provide neuroprotection in the acute phase of ischemia[14]. As shown in Fig 4, our study was in line with previous theory.

The neuroprotective effects of propofol have been extensively studied in previous investigations[38]. In this study, our data suggested that 25 $\mu$ M propofol inhibited microglial activation and suppresses cytokine release as well as apoptosis, which were induced by hypoxia injury. And our data is consistent with the previous study, which found that propofol suppressed hypoxia/reoxygenation-induced apoptosis in HBVSMC[39]. In patients, the effect site (brain) concentrations of propofol have been reported to range from about 2 to 6  $\mu$ g/mL, which are equivalent to 11 to 33 $\mu$ M. In BV2 microglial cells, 30 $\mu$ M propofol was considered a clinically relevant concentration[40]. Therefore, in our study, the effective concentration of propofol was clinically relevant. Further, the underlying mechanism may involve maintaining intracellular  $Ca^{2+}$  hemostasis. Because we used BAPTA-AM, a calcium chelator, and found the effect of BAPTA-AM was similar to that of propofol. Consistently, animal study has showed that propofol exert neuroprotective effect via preventing calcium-induced mitochondrial swelling [41]. Besides, the JAK1/STAT3 pathway was also involved in the protective mechanism. In cervical cancer cells, previous study showed that propofol could enhance cisplatin-induced apoptosis via EGFR/JAK2/STAT3 pathway[42]. However, in our study, we found propofol could exert protective effects via activating JAK1, and inducing the phosphorylation of STAT3 at Tyr-705. Consistently, we used INCB039110, a selective JAK1 inhibitor, and found it could reverse the effect of propofol.

There are some limitations in this study. Firstly, the study was carried out in cultured cell line. It is noted that the data obtained from cell line may differ from those from primary culture and animal studies, and we are planning to perform the experiment in the mice model to validate our findings. Secondly, we found the beneficial effects of propofol were mediated via activating JAK1/STAT3 pathway, but we didn't exam how JAK1/STAT3 pathway was activated. Future experiments are required to address this issue.

In summary, our study identified that propofol could exhibit anti-neuroinflammatory activity in vitro by suppressing the pro-inflammatory mediators from  $CoCl_2$ -induced BV2 microglial cells and in turn prevents neuronal from further damage. Additionally, these beneficial effects were mediated via inhibiting cellular  $Ca^{2+}$  overload, modulating the phosphorylation of CaMKII, ERK and NF- $\kappa$ B, and activating JAK1/STAT3 pathway.

## Author Contributions

**Conceptualization:** JC CM.

**Data curation:** YG.

**Formal analysis:** YL.

**Investigation:** YL XD.

**Methodology:** YL JW.

**Project administration:** JC.

**Software:** XD.

**Supervision:** JC.

**Validation:** CM.

**Visualization:** JW.

**Writing – original draft:** YL.

**Writing – review & editing:** YL YG.

## References

1. McDonough A, Weinstein JR. Neuroimmune Response in Ischemic Preconditioning. *Neurotherapeutics*. 2016; 13(4):748–61. <https://doi.org/10.1007/s13311-016-0465-z> PMID: 27525700.
2. Anttila JE, Whitaker KW, Wires ES, Harvey BK, Airavaara M. Role of microglia in ischemic focal stroke and recovery: focus on Toll-like receptors. *Prog Neuropsychopharmacol Biol Psychiatry*. 2016. <https://doi.org/10.1016/j.pnpbp.2016.07.003> PMID: 27389423.
3. Xiong XY, Liu L, Yang QW. Functions and mechanisms of microglia/macrophages in neuroinflammation and neurogenesis after stroke. *Prog Neurobiol*. 2016; 142:23–44. <https://doi.org/10.1016/j.pneurobio.2016.05.001> PMID: 27166859.
4. Zhou JM, Gu SS, Mei WH, Zhou J, Wang ZZ, Xiao W. Ginkgolides and bilobalide protect BV2 microglia cells against OGD/reoxygenation injury by inhibiting TLR2/4 signaling pathways. *Cell Stress Chaperones*. 2016; 21(6):1037–53. <https://doi.org/10.1007/s12192-016-0728-y> PMID: 27562518;
5. Geiseler SJ, Larson J, Folkow LP. Synaptic transmission despite severe hypoxia in hippocampal slices of the deep-diving hooded seal. *Neuroscience*. 2016; 334:39–46. <https://doi.org/10.1016/j.neuroscience.2016.07.034> PMID: 27480049.
6. Lam SY, Liu Y, Ng KM, Lau CF, Liong EC, Tipoe GL, et al. Chronic intermittent hypoxia induces local inflammation of the rat carotid body via functional upregulation of proinflammatory cytokine pathways. *Histochem Cell Biol*. 2012; 137(3):303–17. <https://doi.org/10.1007/s00418-011-0900-5> PMID: 22187044;
7. Korvers L, de Andrade Costa A, Mersch M, Matyash V, Kettenmann H, Semtner M. Spontaneous Ca<sup>2+</sup> transients in mouse microglia. *Cell Calcium*. 2016. <https://doi.org/10.1016/j.ceca.2016.09.004> PMID: 27697289.
8. Farber K, Kettenmann H. Functional role of calcium signals for microglial function. *Glia*. 2006; 54(7):656–65. <https://doi.org/10.1002/glia.20412> PMID: 17006894.
9. Hoffmann A, Kann O, Ohlemeyer C, Hanisch UK, Kettenmann H. Elevation of basal intracellular calcium as a central element in the activation of brain macrophages (microglia): suppression of receptor-evoked calcium signaling and control of release function. *J Neurosci*. 2003; 23(11):4410–9. PMID: 12805281.
10. Bell JR, Vila-Petroff M, Delbridge LM. CaMKII-dependent responses to ischemia and reperfusion challenges in the heart. *Front Pharmacol*. 2014; 5:96. <https://doi.org/10.3389/fphar.2014.00096> PMID: 24834054;
11. Zhang T, Zhang Y, Cui M, Jin L, Wang Y, Lv F, et al. CaMKII is a RIP3 substrate mediating ischemia- and oxidative stress-induced myocardial necroptosis. *Nat Med*. 2016; 22(2):175–82. <https://doi.org/10.1038/nm.4017> PMID: 26726877.
12. Banerjee C, Khatri P, Raman R, Bhatia H, Datta M, Mazumder S. Role of calmodulin-calmodulin kinase II, cAMP/protein kinase A and ERK 1/2 on *Aeromonas hydrophila*-induced apoptosis of head kidney macrophages. *PLoS Pathog*. 2014; 10(4):e1004018. <https://doi.org/10.1371/journal.ppat.1004018> PMID: 24763432;
13. Yan Z, Gibson SA, Buckley JA, Qin H, Benveniste EN. Role of the JAK/STAT signaling pathway in regulation of innate immunity in neuroinflammatory diseases. *Clin Immunol*. 2016. <https://doi.org/10.1016/j.clim.2016.09.014> PMID: 27713030.
14. Chen H, Lin W, Zhang Y, Lin L, Chen J, Zeng Y, et al. IL-10 Promotes Neurite Outgrowth and Synapse Formation in Cultured Cortical Neurons after the Oxygen-Glucose Deprivation via JAK1/STAT3 Pathway. *Sci Rep*. 2016; 6:30459. <https://doi.org/10.1038/srep30459> PMID: 27456198;
15. You L, Li L, Xu Q, Ren J, Zhang F. Postconditioning reduces infarct size and cardiac myocyte apoptosis via the opioid receptor and JAK-STAT signaling pathway. *Mol Biol Rep*. 2011; 38(1):437–43. <https://doi.org/10.1007/s11033-010-0126-y> PMID: 20349141.

16. Lemoine S, Zhu L, Legallois D, Massetti M, Manrique A, Hanouz JL. Atorvastatin-induced cardioprotection of human myocardium is mediated by the inhibition of mitochondrial permeability transition pore opening via tumor necrosis factor- $\alpha$  and Janus kinase/signal transducers and activators of transcription pathway. *Anesthesiology*. 2013; 118(6):1373–84. <https://doi.org/10.1097/ALN.0b013e31828a7039> PMID: 23416384.
17. Kim OS, Park EJ, Joe EH, Jou I. JAK-STAT signaling mediates gangliosides-induced inflammatory responses in brain microglial cells. *J Biol Chem*. 2002; 277(43):40594–601. <https://doi.org/10.1074/jbc.M203885200> PMID: 12191995.
18. Mandal T, Bhowmik A, Chatterjee A, Chatterjee U, Chatterjee S, Ghosh MK. Reduced phosphorylation of Stat3 at Ser-727 mediated by casein kinase 2—protein phosphatase 2A enhances Stat3 Tyr-705 induced tumorigenic potential of glioma cells. *Cell Signal*. 2014; 26(8):1725–34. <https://doi.org/10.1016/j.cellsig.2014.04.003> PMID: 24726840.
19. Zhu M, Wen M, Sun X, Chen W, Chen J, Miao C. Propofol protects against high glucose-induced endothelial apoptosis and dysfunction in human umbilical vein endothelial cells. *Anesthesia and analgesia*. 2015; 120(4):781–9. PMID: 25793913.
20. Yang P, Yang N, Zhang X, Xu X. The significance and mechanism of propofol on treatment of ischemia reperfusion induced lung injury in rats. *Cell Biochem Biophys*. 2014; 70(3):1527–32. <https://doi.org/10.1007/s12013-014-0088-0> PMID: 25074530.
21. Yoo YC, Yoo KJ, Lim BJ, Jun JH, Shim JK, Kwak YL. Propofol attenuates renal ischemia-reperfusion injury aggravated by hyperglycemia. *J Surg Res*. 2013; 183(2):783–91. <https://doi.org/10.1016/j.jss.2013.02.017> PMID: 23498343.
22. Kochs E, Hoffman WE, Werner C, Thomas C, Albrecht RF, Schulte am Esch J. The effects of propofol on brain electrical activity, neurologic outcome, and neuronal damage following incomplete ischemia in rats. *Anesthesiology*. 1992; 76(2):245–52. PMID: 1736701.
23. Zhang DX, Ding HZ, Jiang S, Zeng YM, Tang QF. An in vitro study of the neuroprotective effect of propofol on hypoxic hippocampal slice. *Brain Inj*. 2014; 28(13–14):1758–65. <https://doi.org/10.3109/02699052.2014.947624> PMID: 25180529.
24. Milanovic D, Pesic V, Loncarevic-Vasiljkovic N, Pavkovic Z, Popic J, Kanazir S, et al. The Fas Ligand/Fas Death Receptor Pathways Contribute to Propofol-Induced Apoptosis and Neuroinflammation in the Brain of Neonatal Rats. *Neurotox Res*. 2016; 30(3):434–52. <https://doi.org/10.1007/s12640-016-9629-1> PMID: 27189477.
25. Zhou R, Yang Z, Tang X, Tan Y, Wu X, Liu F. Propofol protects against focal cerebral ischemia via inhibition of microglia-mediated proinflammatory cytokines in a rat model of experimental stroke. *PLoS One*. 2013; 8(12):e82729. <https://doi.org/10.1371/journal.pone.0082729> PMID: 24349350;
26. Shimizu T, Smits R, Ikenaka K. Microglia-induced activation of non-canonical Wnt signaling aggravates neurodegeneration in demyelinating disorders. *Mol Cell Biol*. 2016. <https://doi.org/10.1128/MCB.00139-16> PMID: 27550808;
27. Yuan L, Liu S, Bai X, Gao Y, Liu G, Wang X, et al. Oxytocin inhibits lipopolysaccharide-induced inflammation in microglial cells and attenuates microglial activation in lipopolysaccharide-treated mice. *J Neuroinflammation*. 2016; 13(1):77. <https://doi.org/10.1186/s12974-016-0541-7> PMID: 27075756;
28. Shao J, Liu T, Xie QR, Zhang T, Yu H, Wang B, et al. Adjudin attenuates lipopolysaccharide (LPS)- and ischemia-induced microglial activation. *J Neuroimmunol*. 2013; 254(1–2):83–90. <https://doi.org/10.1016/j.jneuroim.2012.09.012> PMID: 23084372;
29. Zhang Y, Gao L, Cheng Z, Cai J, Niu Y, Meng W, et al. Kukoamine A Prevents Radiation-Induced Neuroinflammation and Preserves Hippocampal Neurogenesis in Rats by Inhibiting Activation of NF- $\kappa$ B and AP-1. *Neurotox Res*. 2016. <https://doi.org/10.1007/s12640-016-9679-4> PMID: 27815817.
30. Kovalovich K, Li W, DeAngelis R, Greenbaum LE, Ciliberto G, Taub R. Interleukin-6 protects against Fas-mediated death by establishing a critical level of anti-apoptotic hepatic proteins FLIP, Bcl-2, and Bcl-xL. *J Biol Chem*. 2001; 276(28):26605–13. <https://doi.org/10.1074/jbc.M100740200> PMID: 11349125.
31. Hillmer EJ, Zhang H, Li HS, Watowich SS. STAT3 signaling in immunity. *Cytokine Growth Factor Rev*. 2016; 31:1–15. <https://doi.org/10.1016/j.cytogfr.2016.05.001> PMID: 27185365;
32. Lee SH, Lee KB, Lee JH, Kang S, Kim HG, Asahara T, et al. Selective Interference Targeting of Lnk in Umbilical Cord-Derived Late Endothelial Progenitor Cells Improves Vascular Repair, Following Hind Limb Ischemic Injury, via Regulation of JAK2/STAT3 Signaling. *Stem Cells*. 2015; 33(5):1490–500. <https://doi.org/10.1002/stem.1938> PMID: 25537795.
33. Ben Haim L, Ceyzeriat K, Carrillo-de Sauvage MA, Aubry F, Auregan G, Guillemier M, et al. The JAK/STAT3 pathway is a common inducer of astrocyte reactivity in Alzheimer's and Huntington's diseases. *J Neurosci*. 2015; 35(6):2817–29. <https://doi.org/10.1523/JNEUROSCI.3516-14.2015> PMID: 25673868.

34. Murase S, Kim E, Lin L, Hoffman DA, McKay RD. Loss of signal transducer and activator of transcription 3 (STAT3) signaling during elevated activity causes vulnerability in hippocampal neurons. *J Neurosci*. 2012; 32(44):15511–20. <https://doi.org/10.1523/JNEUROSCI.2940-12.2012> PMID: 23115188;
35. Muraoka O, Xu B, Tsurumaki T, Akira S, Yamaguchi T, Higuchi H. Leptin-induced transactivation of NPY gene promoter mediated by JAK1, JAK2 and STAT3 in the neural cell lines. *Neurochem Int*. 2003; 42(7):591–601. PMID: 12590942.
36. Murase S, McKay RD. Neuronal activity-dependent STAT3 localization to nucleus is dependent on Tyr-705 and Ser-727 phosphorylation in rat hippocampal neurons. *Eur J Neurosci*. 2014; 39(4):557–65. <https://doi.org/10.1111/ejn.12412> PMID: 24199834.
37. Breit A, Besik V, Solinski HJ, Muehlich S, Glas E, Yarwood SJ, et al. Serine-727 phosphorylation activates hypothalamic STAT-3 independently from tyrosine-705 phosphorylation. *Mol Endocrinol*. 2015; 29(3):445–59. <https://doi.org/10.1210/me.2014-1300> PMID: 25584415.
38. Chen J, Chen W, Zhu M, Zhu Y, Xu P, Miao C. Angiotensin II-induced mouse hippocampal neuronal HT22 cell apoptosis was inhibited by propofol: Role of neuronal nitric oxide synthase and metallothionein-3. *Neuroscience*. 2015; 305:117–27. <https://doi.org/10.1016/j.neuroscience.2015.07.076> PMID: 26241336.
39. Zhang J, Xia Y, Xu Z, Deng X. Propofol Suppressed Hypoxia/Reoxygenation-Induced Apoptosis in HBVSMC by Regulation of the Expression of Bcl-2, Bax, Caspase3, Kir6.1, and p-JNK. *Oxid Med Cell Longev*. 2016; 2016:1518738. <https://doi.org/10.1155/2016/1518738> PMID: 27057270;
40. Zhou CH, Zhu YZ, Zhao PP, Xu CM, Zhang MX, Huang H, et al. Propofol Inhibits Lipopolysaccharide-Induced Inflammatory Responses in Spinal Astrocytes via the Toll-Like Receptor 4/MyD88-Dependent Nuclear Factor-kappaB, Extracellular Signal-Regulated Protein Kinases1/2, and p38 Mitogen-Activated Protein Kinase Pathways. *Anesth Analg*. 2015; 120(6):1361–8. PMID: 25695672.
41. Li J, Yu W, Li XT, Qi SH, Li B. The effects of propofol on mitochondrial dysfunction following focal cerebral ischemia-reperfusion in rats. *Neuropharmacology*. 2014; 77:358–68. <https://doi.org/10.1016/j.neuropharm.2013.08.029> PMID: 24035920.
42. Li H, Lu Y, Pang Y, Li M, Cheng X, Chen J. Propofol enhances the cisplatin-induced apoptosis on cervical cancer cells via EGFR/JAK2/STAT3 pathway. *Biomed Pharmacother*. 2017; 86:324–33. <https://doi.org/10.1016/j.biopha.2016.12.036> PMID: 28011380.
